# Supplementary material
Source: MDPI journal article supplement (https://www.mdpi.com/1996-1073/14/10/2894)
Supplement: s1 [file s1]

**Table S1.** Extracted data for ANN model development for prediction of hydrogen production in catalytic dry reforming.

| Type of Hydrocarbon                                      | Type of Catalyst                                                           | CO <sub>2</sub> /Hydrocarbon Molar Ratio | Reaction Temperature (K) | Pressure (Mpa) | Hydrocarbon Conversion (%) | H <sub>2</sub> Yield (%) | Stability Test Time (H) | Ref. |
|----------------------------------------------------------|----------------------------------------------------------------------------|------------------------------------------|--------------------------|----------------|----------------------------|--------------------------|-------------------------|------|
| Methane (CH <sub>4</sub> )                               | Ni-Co/MgO-ZrO <sub>2</sub>                                                 | 3                                        | 1022.15                  | -              | 87.7                       | 85.5                     | 100                     | [1]  |
| Methane (CH <sub>4</sub> )                               | Ni-Co/Al <sub>2</sub> O <sub>3</sub>                                       | 1                                        | 1123.15                  | 0.1            | 97.89                      | 98.21                    | 24                      | [2]  |
| Methane (CH <sub>4</sub> )                               | MgO-coated Ni/SBA-15                                                       | 1                                        | 1073.15                  | 0.1            | 98                         | 82                       | 40                      | [3]  |
| Methane (CH <sub>4</sub> )                               | Ce-Co-Ni/Al <sub>2</sub> O <sub>3</sub>                                    | 1                                        | 1023                     | 0.1            | 68                         | 64                       | 2.5                     | [4]  |
| Methane (CH <sub>4</sub> )                               | Ni/CH-Pr                                                                   | 1                                        | 1023.15                  | 0.1            | 98                         | 97                       | 150                     | [5]  |
| Methane (CH <sub>4</sub> )                               | Sr loading on Co/γ-Al <sub>2</sub> O <sub>3</sub>                          | 1                                        | 973.15                   | 0.1            | -                          | 77.9                     | 5.8                     | [6]  |
| Methane (CH <sub>4</sub> )                               | LaNi <sub>0.99</sub> Pd <sub>0.01</sub> O <sub>3</sub>                     | 1                                        | 1123.15                  | 0.1            | 100                        | 41                       | 24                      | [7]  |
| Methane (CH <sub>4</sub> )                               | NiPd/10CeO <sub>2</sub> .5ZrO <sub>2</sub> /Al <sub>2</sub> O <sub>3</sub> | 1                                        | 1073.15                  | 0.1            | 100                        | 75                       | 20                      | [8]  |
| Methane (CH <sub>4</sub> )                               | Ni-Zr polyol                                                               | 1                                        | 1073.15                  | 0.1            | 96.6                       | 86.4                     | 6                       | [9]  |
| Glycerol (C <sub>3</sub> H <sub>8</sub> O <sub>3</sub> ) | La-Ni/Al <sub>2</sub> O <sub>3</sub>                                       | 1                                        | 873                      | -              | 24.5                       | 9.7                      | -                       | [10] |
| Methane (CH <sub>4</sub> )                               | MgCoNi/Al <sub>2</sub> O <sub>3</sub>                                      | 1                                        | 1123.15                  | 0.1            | 95                         | 97                       | 200                     | [11] |
| Methane (CH <sub>4</sub> )                               | Co/ZrO <sub>2</sub>                                                        | 1                                        | 973.15                   | 0.1            | -                          | 80                       | 6                       | [12] |
| Methane (CH <sub>4</sub> )                               | Co/CeO <sub>2</sub>                                                        | 1                                        | 873.15                   | 0.1            | -                          | 60                       | 6                       | [12] |
| Methane (CH <sub>4</sub> )                               | Co/Y                                                                       | 1                                        | 1123.15                  | 0.1            | 79                         | 60                       | 10                      | [13] |
| Methane (CH <sub>4</sub> )                               | Ni/CeO <sub>2</sub>                                                        | 1                                        | 973.15                   | 0.1            | 65                         | 39                       | 5                       | [14] |
| Methane (CH <sub>4</sub> )                               | Ni-Co/CeO <sub>2</sub>                                                     | 1                                        | 973.15                   | 0.1            | 68                         | 40                       | 5                       | [14] |
| Methane (CH <sub>4</sub> )                               | Co/CeO <sub>2</sub>                                                        | 1                                        | 973.15                   | 0.1            | 6                          | 0                        | 5                       | [14] |
| Methane (CH <sub>4</sub> )                               | Ni/CeO <sub>2</sub>                                                        | 1                                        | 1123.15                  | 0.1            | 58                         | 32                       | 5                       | [14] |
| Methane (CH <sub>4</sub> )                               | Ni-Co/CeO <sub>2</sub>                                                     | 1                                        | 1123.15                  | 0.1            | 59                         | 33                       | 5                       | [14] |
| Methane (CH <sub>4</sub> )                               | Co/CeO <sub>2</sub>                                                        | 1                                        | 1123.15                  | 0.1            | 6                          | 0                        | 5                       | [14] |
| Methane (CH <sub>4</sub> )                               | Rh/Al <sub>2</sub> O <sub>3</sub>                                          | 1                                        | 1073.15                  | 0.1            | 83.6                       | 46                       | 6                       | [15] |
| Methane (CH <sub>4</sub> )                               | Rh/NiO-Al <sub>2</sub> O <sub>3</sub>                                      | 1                                        | 1073.15                  | 0.1            | 89.3                       | 94                       | 6                       | [15] |
| Methane (CH <sub>4</sub> )                               | Rh/MgO-Al <sub>2</sub> O <sub>3</sub>                                      | 1                                        | 1073.15                  | 0.1            | 80.8                       | 44                       | 6                       | [15] |
| Methane (CH <sub>4</sub> )                               | Rh/ZrO <sub>2</sub> -Al <sub>2</sub> O <sub>3</sub>                        | 1                                        | 1073.15                  | 0.1            | 84.3                       | 47                       | 6                       | [15] |
| Methane (CH <sub>4</sub> )                               | Rh/CeO <sub>2</sub> -Al <sub>2</sub> O <sub>3</sub>                        | 1                                        | 1073.15                  | 0.1            | 80.3                       | 42                       | 6                       | [15] |
| Methane (CH <sub>4</sub> )                               | Rh/La <sub>2</sub> O <sub>3</sub> -Al <sub>2</sub> O <sub>3</sub>          | 1                                        | 1073.15                  | 0.1            | 72.5                       | 42                       | 6                       | [15] |
| Ethanol (C <sub>2</sub> H <sub>5</sub> OH)               | Rh/Al <sub>2</sub> O <sub>3</sub>                                          | 1                                        | 1073.15                  | 0.1            | -                          | 28                       | 6                       | [15] |

|                                                             |                                                                       |   |         |     |       |       |      |      |
|-------------------------------------------------------------|-----------------------------------------------------------------------|---|---------|-----|-------|-------|------|------|
| Ethanol<br>(C <sub>2</sub> H <sub>5</sub> OH)               | Rh/NiO-<br>Al <sub>2</sub> O <sub>3</sub>                             | 1 | 1073.15 | 0.1 | -     | 35    | 6    | [15] |
| Ethanol<br>(C <sub>2</sub> H <sub>5</sub> OH)               | Rh/MgO-<br>Al <sub>2</sub> O <sub>3</sub>                             | 1 | 1073.15 | 0.1 | -     | 28    | 6    | [15] |
| Ethanol<br>(C <sub>2</sub> H <sub>5</sub> OH)               | Rh/ZrO <sub>2</sub> -<br>Al <sub>2</sub> O <sub>3</sub>               | 1 | 1073.15 | 0.1 | -     | 24    | 6    | [15] |
| Ethanol<br>(C <sub>2</sub> H <sub>5</sub> OH)               | Rh/CeO <sub>2</sub> -<br>Al <sub>2</sub> O <sub>3</sub>               | 1 | 1073.15 | 0.1 | -     | 28    | 6    | [15] |
| Ethanol<br>(C <sub>2</sub> H <sub>5</sub> OH)               | Rh/La <sub>2</sub> O <sub>3</sub> -<br>Al <sub>2</sub> O <sub>3</sub> | 1 | 1073.15 | 0.1 | -     | 29    | 6    | [15] |
| Ethanol<br>(C <sub>2</sub> H <sub>5</sub> OH)               | NiO-Al <sub>2</sub> O <sub>3</sub>                                    | 1 | 1073.15 | 0.1 | -     | 29    | 6    | [15] |
| Methane (CH <sub>4</sub> )                                  | Co-Ce/ZrO <sub>2</sub>                                                | 1 | 973     | 0.1 | 74    | 72    | 6    | [16] |
| Methane (CH <sub>4</sub> )                                  | Ni-<br>Co/Al <sub>2</sub> O <sub>3</sub> -<br>MgO                     | 1 | 1123.15 | 0.1 | 97.5  | 94    | 20   | [17] |
| Methane (CH <sub>4</sub> )                                  | 3La 2Co<br>7Ni/MSU-S                                                  | 1 | 1023.15 | 0.1 | 93    | 99    | 50   | [18] |
| Glycerol<br>(C <sub>3</sub> H <sub>8</sub> O <sub>3</sub> ) | Ni/ZrO <sub>2</sub>                                                   | 1 | 973.15  | 0.1 | 26    | 13    | 3    | [19] |
| Glycerol<br>(C <sub>3</sub> H <sub>8</sub> O <sub>3</sub> ) | Ni/CaO                                                                | 1 | 973.15  | 0.1 | 29    | 23    | 3    | [19] |
| Methane (CH <sub>4</sub> )                                  | Co/CeO <sub>2</sub>                                                   | 1 | 1023    | 0.1 | 79.5  | 37.6  | 4    | [20] |
| Methane (CH <sub>4</sub> )                                  | Co/CeO <sub>2</sub>                                                   | 1 | 1023    | 0.1 | -     | 41.98 | 2    | [21] |
| Methane (CH <sub>4</sub> )                                  | Co/La <sub>2</sub> O <sub>3</sub>                                     | 1 | 1023    | 0.1 | 50    | 45    | -    | [21] |
| Methane (CH <sub>4</sub> )                                  | BaZrRhO <sub>3</sub>                                                  | 1 | 1023    | 0.1 | 79    | 100   | 65   | [22] |
| Methane (CH <sub>4</sub> )                                  | BaZrRuO <sub>3</sub>                                                  | 1 | 1023    | 0.1 | 60    | 98    | 65   | [22] |
| Methane (CH <sub>4</sub> )                                  | BaZrPtO <sub>3</sub>                                                  | 1 | 1023    | 0.1 | 32    | 90    | 65   | [22] |
| Methane (CH <sub>4</sub> )                                  | Ni/mesopor-<br>ous SiO <sub>2</sub>                                   | 1 | 973.15  | 0.1 | 78    | 80    | 30   | [23] |
| Methane (CH <sub>4</sub> )                                  | Ni//ZrO <sub>2</sub>                                                  | 1 | 1123.15 | 0.1 | 98    | 97    | 30   | [24] |
| Methane (CH <sub>4</sub> )                                  | Ni/Al <sub>2</sub> O <sub>3</sub>                                     | 1 | 973.15  | 0.1 | 59    | 50    | 10   | [25] |
| Methane (CH <sub>4</sub> )                                  | Ni-Co/SiO <sub>2</sub>                                                | 1 | 1023.15 | 0.1 | 100   | 85    | 100  | [26] |
| Methane (CH <sub>4</sub> )                                  | NiO-CaO                                                               | 1 | 873.15  | 0.1 | -     | 47.1  | 0.48 | [27] |
| Methane (CH <sub>4</sub> )                                  | Ni/Al <sub>2</sub> O <sub>3</sub>                                     | 1 | 1073.15 | 0.1 | 78    | 74    | 20   | [28] |
| Methane (CH <sub>4</sub> )                                  | Ni/Mg-Al-O                                                            | 1 | 1073.15 | 0.1 | 83    | 79    | 20   | [28] |
| Methane (CH <sub>4</sub> )                                  | Ni-Nd/Mg-<br>Al-O                                                     | 1 | 1073.15 | 0.1 | 89    | 82    | 20   | [28] |
| Methane (CH <sub>4</sub> )                                  | Ni-Ce/Mg-<br>Al-O                                                     | 1 | 1073.15 | 0.1 | 93    | 86    | 20   | [28] |
| Methane (CH <sub>4</sub> )                                  | Li <sub>2</sub> ZrO <sub>3</sub>                                      | 1 | 1173.15 | 0.1 | 87    | 45    | 3    | [29] |
| Methane (CH <sub>4</sub> )                                  | Na <sub>2</sub> ZrO <sub>3</sub>                                      | 1 | 1173.15 | 0.1 | 79    | 28    | 3    | [29] |
| Methane (CH <sub>4</sub> )                                  | NiO(10)/Na <sub>2</sub><br>ZrO <sub>3</sub>                           | 1 | 923.15  | 0.1 | -     | 26.1  | -    | [30] |
| Methane (CH <sub>4</sub> )                                  | LaNiO <sub>3</sub><br>with<br>chitosan                                | 1 | 1073.15 | 0.1 | 95    | 93    | 7    | [31] |
| Methane (CH <sub>4</sub> )                                  | Ni-<br>Co/Al <sub>2</sub> O <sub>3</sub>                              | 1 | 973     | 0.1 | 67    | 49    | 4    | [32] |
| Methane (CH <sub>4</sub> )                                  | Ni-<br>Co/Al <sub>2</sub> O <sub>3</sub> -                            | 1 | 1073.15 | 0.1 | 86.96 | 78    | 8    | [33] |

| MgO/Nb-Zr                                                |                                                                    |      |         |     |       |      |      |      |
|----------------------------------------------------------|--------------------------------------------------------------------|------|---------|-----|-------|------|------|------|
| Methane (CH <sub>4</sub> )                               | Ni/Al <sub>2</sub> O <sub>3</sub>                                  | 1    | 1023.15 | 0.1 | 93    | 90   | 50   | [34] |
| Methane (CH <sub>4</sub> )                               | Ru/Al <sub>2</sub> O <sub>3</sub>                                  | 1    | 1023.15 | 0.1 | 90    | 88   | 50   | [34] |
| Methane (CH <sub>4</sub> )                               | Ru-Ni/Al <sub>2</sub> O <sub>3</sub>                               | 1    | 1023.15 | 0.1 | 94    | 93   | 50   | [34] |
| Methane (CH <sub>4</sub> )                               | Ni/YSZ                                                             | 1    | 1023.15 | 0.1 | 92    | 88   | 50   | [34] |
| Methane (CH <sub>4</sub> )                               | Ru/YSZ                                                             | 1    | 1023.15 | 0.1 | 80    | 74   | 50   | [34] |
| Methane (CH <sub>4</sub> )                               | Ru-Ni/YSZ                                                          | 1    | 1023.15 | 0.1 | 93    | 89   | 50   | [34] |
| Methane (CH <sub>4</sub> )                               | Ni/MgAl <sub>2</sub> O <sub>4</sub>                                | 1    | 1023.15 | 0.1 | 99    | 97   | 50   | [34] |
| Methane (CH <sub>4</sub> )                               | Ru/MgAl <sub>2</sub> O <sub>4</sub>                                | 1    | 1023.15 | 0.1 | 6     | -    | 50   | [34] |
| Methane (CH <sub>4</sub> )                               | Ru-Ni/MgAl <sub>2</sub> O <sub>4</sub>                             | 1    | 1023.15 | 0.1 | 93    | 90   | 50   | [34] |
| Methane (CH <sub>4</sub> )                               | Ni/MgAl <sub>2</sub> O <sub>4</sub>                                | 1    | 1023.15 | 0.1 | 96    | 96   | 50   | [34] |
| Methane (CH <sub>4</sub> )                               | Ni-BN-R                                                            | 1    | 1023.15 | 0.1 | 52    | -    | 20   | [35] |
| Methane (CH <sub>4</sub> )                               | NiMA-1-R                                                           | 1    | 1023.15 | 0.1 | 78    | -    | 20   | [35] |
| Methane (CH <sub>4</sub> )                               | NiMA-2-R                                                           | 1    | 1023.15 | 0.1 | 77    | -    | 20   | [35] |
| Methane (CH <sub>4</sub> )                               | NiMA-BN-L-R                                                        | 1    | 1023.15 | 0.1 | 65    | -    | 20   | [35] |
| Methane (CH <sub>4</sub> )                               | NiMA-BN-H-R                                                        | 1    | 1023.15 | 0.1 | 80    | -    | 20   | [35] |
| Methane (CH <sub>4</sub> )                               | NiMA-BN-M-R                                                        | 1    | 1023.15 | 0.1 | 85    | -    | 20   | [35] |
| Glycerol (C <sub>3</sub> H <sub>8</sub> O <sub>3</sub> ) | Ag-Ni/Al <sub>2</sub> O <sub>3</sub>                               | 1    | 1073    | 0.1 | 40.7  | 32   | 72   | [36] |
| Glycerol (C <sub>3</sub> H <sub>8</sub> O <sub>3</sub> ) | Re-Ni/CaO                                                          | 1    | 1073.15 | 0.1 | 61    | 56   | 2    | [37] |
| Methane (CH <sub>4</sub> )                               | NiCe                                                               | 1    | 773.15  | 0.1 | -     | 23   | 18   | [38] |
| Methane (CH <sub>4</sub> )                               | NiAl                                                               | 1    | 773.15  | 0.1 | -     | 25   | 18   | [38] |
| Methane (CH <sub>4</sub> )                               | NiZr                                                               | 1    | 773.15  | 0.1 | -     | 8    | 18   | [38] |
| Methane (CH <sub>4</sub> )                               | NiSi                                                               | 1    | 773.15  | 0.1 | -     | 4    | 18   | [38] |
| Methane (CH <sub>4</sub> )                               | NiTi                                                               | 1    | 773.15  | 0.1 | -     | 0    | 18   | [38] |
| Methane (CH <sub>4</sub> )                               | NiMgO/AC                                                           | 1    | 1073.15 | 0.1 | 84    | 96   | -    | [39] |
| Methane (CH <sub>4</sub> )                               | Ni/MgO/AC                                                          | 1    | 1073.15 | 0.1 | 88    | 98   | -    | [39] |
| Methane (CH <sub>4</sub> )                               | Co-Ce/Ca/AC-N                                                      | 1    | 1073.15 | 0.1 | 69    | 78   | 12.5 | [40] |
| Methane (CH <sub>4</sub> )                               | Ni <sub>60</sub> Co <sub>40</sub> alloy                            | 1    | 1223.15 | 0.1 | 61    | 55   | 50   | [41] |
| Methane (CH <sub>4</sub> )                               | Ni/SBA-15                                                          | 1    | 1073.15 | 0.1 | 87.11 | 80   | 24   | [42] |
| Methane (CH <sub>4</sub> )                               | Zr/Ni/SBA-15                                                       | 1    | 1073.15 | 0.1 | 87.07 | 42   | 5    | [43] |
| Methane (CH <sub>4</sub> )                               | 1.5CeeNi5/MgAl <sub>2</sub> O <sub>4</sub>                         | 1    | 1023.15 | 0.1 | 92    | 87.5 | 4    | [44] |
| Methane (CH <sub>4</sub> )                               | 1.5CeeNi5/MgAl <sub>2</sub> O <sub>5</sub>                         | 1    | 923.15  | 0.1 | 72    | 65.2 | 4    | [44] |
| Methane (CH <sub>4</sub> )                               | Pt/xLa <sub>2</sub> O <sub>3</sub> -Al <sub>2</sub> O <sub>3</sub> | 1    | 873.15  | 0.1 | 35    | -    | 24   | [45] |
| Methane (CH <sub>4</sub> )                               | Ni/Al <sub>2</sub> O <sub>3</sub>                                  | 0.48 | 973.15  | 0.1 | 100   | -    | 24   | [46] |
| Methane (CH <sub>4</sub> )                               | Ni/mesoporous silica                                               | 1    | 1023    | 0.1 | 98    | 72   | 25   | [47] |
| Methane (CH <sub>4</sub> )                               | NiPd-SP-OA                                                         | 1    | 973.15  | 0.1 | 73    | 65   | 6    | [48] |

|                            |                                   |   |         |     |      |      |    |      |
|----------------------------|-----------------------------------|---|---------|-----|------|------|----|------|
| Methane (CH <sub>4</sub> ) | NiPd-SP-Imp                       | 1 | 973.15  | 0.1 | 46   | 38.5 | 6  | [48] |
| Methane (CH <sub>4</sub> ) | Ni-SP-OA                          | 1 | 973.15  | 0.1 | 50   | 45   | 6  | [48] |
| Methane (CH <sub>4</sub> ) | Ni-SP-Imp                         | 1 | 973.15  | 0.1 | 37.5 | 35   | 6  | [48] |
| Methane (CH <sub>4</sub> ) | Pd-SP-Imp                         | 1 | 973.15  | 0.1 | 7    | 8.5  | 6  | [48] |
| Methane (CH <sub>4</sub> ) | Co/Al <sub>2</sub> O <sub>3</sub> | 1 | 1073    | 0.1 | 76.2 | 63   | 8  | [49] |
| Methane (CH <sub>4</sub> ) | CeO <sub>2</sub> -Ni              | 1 | 1023.15 | 0.1 | 93   | 90   | 50 | [50] |

## References

1. Fan, M.-S., A.Z. Abdullah, and S. Bhatia, *Hydrogen production from carbon dioxide reforming of methane over Ni-Co/MgO-ZrO<sub>2</sub> catalyst: Process optimization*. international journal of hydrogen energy, 2011. **36**(8): p. 4875-4886.
2. Sajjadi, S.M., et al., *Hydrogen production via CO 2-reforming of methane over Cu and Co doped Ni/Al<sub>2</sub>O<sub>3</sub> nanocatalyst: impregnation versus sol-gel method and effect of process conditions and promoter*. Journal of sol-gel science and technology, 2013. **67**(3): p. 601-617.
3. Wang, N., et al., *Synthesis, characterization and catalytic performance of MgO-coated Ni/SBA-15 catalysts for methane dry reforming to syngas and hydrogen*. International journal of hydrogen energy, 2013. **38**(23): p. 9718-9731.
4. Alenazey, F.S., *Utilizing carbon dioxide as a regenerative agent in methane dry reforming to improve hydrogen production and catalyst activity and longevity*. International Journal of Hydrogen Energy, 2014. **39**(32): p. 18632-18641.
5. Harshini, D., et al., *Catalytic Hydrogen Production via Dry Reforming of Methane Over Ni/Ce 0.65 Hf 0.25 M 0.1 O 2-δ (M= Tb, Sm, Nd, Pr and La)*. Catalysis letters, 2014. **144**(4): p. 656-662.
6. Ibrahim, A.A., A.H. Fakeeha, and A.S. Al-Fatesh, *Enhancing hydrogen production by dry reforming process with strontium promoter*. International Journal of Hydrogen Energy, 2014. **39**(4): p. 1680-1687.
7. Ismagilov, I.Z., et al., *Hydrogen production by autothermal reforming of methane: Effect of promoters (Pt, Pd, Re, Mo, Sn) on the performance of Ni/La<sub>2</sub>O<sub>3</sub> catalysts*. Applied Catalysis A: General, 2014. **481**: p. 104-115.
8. Ismagilov, I.Z., et al., *Hydrogen production by autothermal reforming of methane over NiPd catalysts: Effect of support composition and preparation mode*. International Journal of Hydrogen Energy, 2014. **39**(36): p. 20992-21006.
9. Naeem, M.A., et al., *Hydrogen production from methane dry reforming over nickel-based nanocatalysts using surfactant-assisted or polyol method*. International Journal of Hydrogen Energy, 2014. **39**(30): p. 17009-17023.
10. Siew, K.W., et al., *Characterization of La-promoted Ni/Al<sub>2</sub>O<sub>3</sub> catalysts for hydrogen production from glycerol dry reforming*. Journal of Energy Chemistry, 2014. **23**(1): p. 15-21.
11. Son, I.H., S.J. Lee, and H.-S. Roh, *Hydrogen production from carbon dioxide reforming of methane over highly active and stable MgO promoted Co-Ni/γ-Al<sub>2</sub>O<sub>3</sub> catalyst*. International journal of hydrogen energy, 2014. **39**(8): p. 3762-3770.
12. Abasaeed, A.E., et al., *Catalytic performance of CeO<sub>2</sub> and ZrO<sub>2</sub> supported Co catalysts for hydrogen production via dry reforming of methane*. International Journal of Hydrogen Energy, 2015. **40**(21): p. 6818-6826.
13. Abdollahifar, M., M. Haghighi, and M. Sharifi, *Dry reforming of methane over nanostructured Co/Y catalyst for hydrogen production: Effect of ultrasound irradiation and Co-loading on catalyst properties and performance*. Energy Conversion and Management, 2015. **103**: p. 1101-1112.
14. Ay, H. and D. Üner, *Dry reforming of methane over CeO<sub>2</sub> supported Ni, Co and Ni-Co catalysts*. Applied Catalysis B: Environmental, 2015. **179**: p. 128-138.
15. Drif, A., et al., *Study of the dry reforming of methane and ethanol using Rh catalysts supported on doped alumina*. Applied Catalysis A: General, 2015. **504**: p. 576-584.
16. Paksoy, A.I., B.S. Caglayan, and A.E. Aksoylu, *A study on characterization and methane dry reforming performance of Co-Ce/ZrO<sub>2</sub> catalyst*. Applied Catalysis B: Environmental, 2015. **168-169**: p. 164-174.
17. Abdollahifar, M., et al., *Sono-synthesis and characterization of bimetallic Ni-Co/Al<sub>2</sub>O<sub>3</sub>-MgO nanocatalyst: Effects of metal content on catalytic properties and activity for hydrogen production via CO<sub>2</sub> reforming of CH<sub>4</sub>*. Ultrasonics Sonochemistry, 2016. **31**: p. 173-183.
18. Amin, R., et al., *Hydrogen and syn gas production via CO<sub>2</sub> dry reforming of methane over Mg/La promoted Co-Ni/MSU-S catalyst*. International Journal of Hydrogen Energy, 2016. **41**(2): p. 807-819.
19. Arif, N.N.M., et al., *Carbon dioxide dry reforming of glycerol for hydrogen production using Ni/ZrO<sub>2</sub> and Ni/CaO as catalysts*. Bulletin of Chemical Reaction Engineering & Catalysis, 2016. **11**(2): p. 200-209.

20. Ayodele, B.V., M.R. Khan, and C.K. Cheng, *Catalytic performance of ceria-supported cobalt catalyst for CO-rich hydrogen production from dry reforming of methane*. International Journal of Hydrogen Energy, 2016. **41**(1): p. 198-207.
21. Ayodele, B.V., M.R. Khan, and C.K. Cheng, *Production of CO-rich hydrogen gas from methane dry reforming over Co/CeO<sub>2</sub> catalyst*. Bulletin of Chemical Reaction Engineering & Catalysis, 2016. **11**(2): p. 210-219.
22. de Caprariis, B., et al., *Rh, Ru and Pt ternary perovskites type oxides BaZr (1-x) MexO<sub>3</sub> for methane dry reforming*. Applied Catalysis A: General, 2016. **517**: p. 47-55.
23. Huang, F., et al., *Catalytic performances of Ni/mesoporous SiO<sub>2</sub> catalysts for dry reforming of methane to hydrogen*. Journal of energy chemistry, 2016. **25**(4): p. 709-719.
24. Li, W., Z. Zhao, and Y. Jiao, *Dry reforming of methane towards CO-rich hydrogen production over robust supported Ni catalyst on hierarchically structured monoclinic zirconia nanosheets*. International Journal of Hydrogen Energy, 2016. **41**(40): p. 17907-17921.
25. Schwengber, C.A., et al., *Methane dry reforming using Ni/Al<sub>2</sub>O<sub>3</sub> catalysts: Evaluation of the effects of temperature, space velocity and reaction time*. Journal of Environmental Chemical Engineering, 2016. **4**(3): p. 3688-3695.
26. Bian, Z. and S. Kawi, *Highly carbon-resistant Ni-Co/SiO<sub>2</sub> catalysts derived from phyllosilicates for dry reforming of methane*. Journal of CO<sub>2</sub> Utilization, 2017. **18**: p. 345-352.
27. Cruz-Hernández, A., J.A. Mendoza-Nieto, and H. Pfeiffer, *NiOCaO materials as promising catalysts for hydrogen production through carbon dioxide capture and subsequent dry methane reforming*. Journal of energy chemistry, 2017. **26**(5): p. 942-947.
28. Fang, X., et al., *Methane dry reforming over Ni/Mg-Al-O: on the significant promotional effects of rare earth Ce and Nd metal oxides*. Journal of CO<sub>2</sub> Utilization, 2018. **25**: p. 242-253.
29. Mendoza-Nieto, J.A., Y. Duan, and H. Pfeiffer, *Alkaline zirconates as effective materials for hydrogen production through consecutive carbon dioxide capture and conversion in methane dry reforming*. Applied Catalysis B: Environmental, 2018. **238**: p. 576-585.
30. Mendoza-Nieto, J.A., et al., *Nickel-doped sodium zirconate catalysts for carbon dioxide storage and hydrogen production through dry methane reforming process*. Applied Catalysis B: Environmental, 2018. **224**: p. 80-87.
31. Oliveira, Á.A.S., et al., *One-step synthesis of LaNiO<sub>3</sub> with chitosan for dry reforming of methane*. International Journal of Hydrogen Energy, 2018. **43**(20): p. 9696-9704.
32. Siang, T.J., et al., *Hydrogen production from CH<sub>4</sub> dry reforming over bimetallic Ni-Co/Al<sub>2</sub>O<sub>3</sub> catalyst*. Journal of the Energy Institute, 2018. **91**(5): p. 683-694.
33. Abd Ghani, N.A., et al., *Dry reforming of methane for hydrogen production over NiCo catalysts: Effect of NbZr promoters*. International Journal of Hydrogen Energy, 2019. **44**(37): p. 20881-20888.
34. Andraos, S., et al., *Production of hydrogen by methane dry reforming over ruthenium-nickel based catalysts deposited on Al<sub>2</sub>O<sub>3</sub>, MgAl<sub>2</sub>O<sub>4</sub>, and YSZ*. International Journal of Hydrogen Energy, 2019. **44**(47): p. 25706-25716.
35. Bu, K., et al., *Methane dry reforming over boron nitride interface-confined and LDHs-derived Ni catalysts*. Applied Catalysis B: Environmental, 2019. **252**: p. 86-97.
36. Harun, N., et al., *Hydrogen production from glycerol dry reforming over Ag-promoted Ni/Al<sub>2</sub>O<sub>3</sub>*. International Journal of Hydrogen Energy, 2019. **44**(1): p. 213-225.
37. Mohd Arif, N.N., et al., *Hydrogen production via CO<sub>2</sub> dry reforming of glycerol over ReNi/CaO catalysts*. International Journal of Hydrogen Energy, 2019. **44**(37): p. 20857-20871.
38. Pizzolitto, C., et al., *Nickel based catalysts for methane dry reforming: Effect of supports on catalytic activity and stability*. International Journal of Hydrogen Energy, 2019. **44**(52): p. 28065-28076.
39. Sharifvaghefi, S., et al., *Application of Microwave in Hydrogen Production from Methane Dry Reforming: Comparison Between the Conventional and Microwave-Assisted Catalytic Reforming on Improving the Energy Efficiency*. Catalysts, 2019. **9**(7): p. 618.
40. Sun, Y., et al., *Dry reforming of methane over Co-Ce-M/AC-N catalyst: Effect of promoters (Ca and Mg) and preparation method on catalytic activity and stability*. International Journal of Hydrogen Energy, 2019. **44**(41): p. 22972-22982.
41. Varsano, F., et al., *Dry reforming of methane powered by magnetic induction*. International Journal of Hydrogen Energy, 2019. **44**(38): p. 21037-21044.
42. Abdullah, N., et al., *Effect of Ni loading on SBA-15 synthesized from palm oil fuel ash waste for hydrogen production via CH<sub>4</sub> dry reforming*. International Journal of Hydrogen Energy, 2020. **45**(36): p. 18411-18425.
43. Abdullah, N., N. Ainirazali, and H. Ellapan, *Structural effect of Ni/SBA-15 by Zr promoter for H<sub>2</sub> production via methane dry reforming*. International Journal of Hydrogen Energy, 2020.
44. Akiki, E., et al., *Production of hydrogen by methane dry reforming: A study on the effect of cerium and lanthanum on Ni/MgAl<sub>2</sub>O<sub>4</sub> catalyst performance*. international journal of hydrogen energy, 2020. **45**(41): p. 21392-21408.

45. Araújo, J.C.S., et al., *Catalytic assessment of nanostructured Pt/xLa<sub>2</sub>O<sub>3</sub>-Al<sub>2</sub>O<sub>3</sub> oxides for hydrogen production by dry reforming of methane: Effects of the lanthana content on the catalytic activity*. Catalysis Today, 2020. **349**: p. 141-149.
46. Dan, M., M. Mihet, and M.D. Lazar, *Hydrogen and/or syngas production by combined steam and dry reforming of methane on nickel catalysts*. International Journal of Hydrogen Energy, 2020. **45**(49): p. 26254-26264.
47. Mourhly, A., et al., *New low cost mesoporous silica (MSN) as a promising support of Ni-catalysts for high-hydrogen generation via dry reforming of methane (DRM)*. International Journal of Hydrogen Energy, 2020. **45**(20): p. 11449-11459.
48. Pan, C., et al., *Anti-sintering mesoporous Ni-Pd bimetallic catalysts for hydrogen production via dry reforming of methane*. International Journal of Hydrogen Energy, 2020. **45**(32): p. 16133-16143.
49. Tran, N.T., et al., *Improvements in hydrogen production from methane dry reforming on filament-shaped mesoporous alumina-supported cobalt nanocatalyst*. International Journal of Hydrogen Energy, 2020.
50. Tu, P.H., et al., *structured catalyst containing CeO<sub>2</sub>-Ni flowers for dry reforming of methane*. International Journal of Hydrogen Energy, 2020. **45**(36): p. 18363-18375.
